# Supplementary material
Source: publisher figshare collection journal article supplement (https://karger.figshare.com/ndownloader/files/37518091)
Supplement: Supplementary file 1 [file 37518091]

| **Supplemental eTable 1. NHANES response rates in interviews and physical examinations, 1999-2018.** | | | | |
| --- | --- | --- | --- | --- |
| **Survey** | **Interviewed sample** | | **Examined sample** | |
| **Unweighted sample** | **Unweighted response**  **rate (%)** | **Unweighted sample** | **Unweighted response**  **rate (%)** |
| **1999-2000** | 9965 | 82 | 9282 | 76 |
| **2001-2002** | 11039 | 84 | 10477 | 80 |
| **2003-2004** | 10122 | 79 | 9643 | 76 |
| **2005-2006** | 10348 | 80.45 | 9950 | 77.36 |
| **2007-2008** | 10149 | 78.4 | 9762 | 75.4 |
| **2009-2010** | 10537 | 79.4 | 10253 | 77.3 |
| **2011-2012** | 9756 | 72.6 | 9338 | 69.5 |
| **2013-2014** | 10175 | 71.0 | 9813 | 68.5 |
| **2015-2016** | 9971 | 61.3 | 9544 | 58.7 |
| **2017-2018** | 9254 | 51.9 | 8704 | 48.8 |
| NHANES, National Health and Nutritional Examination Survey | | | | |

| **Supplemental eTable 2. Serum creatinine calibration in NHANES periods** | | |
| --- | --- | --- |
| **Years** | **Serum creatinine calibration equation** | **Reference** |
| **1999-2000** | Standard Creatinine =  1.013*(measured creatinine) + 0.147 | https://wwwn.cdc.gov/ Nchs/Nhanes/1999-2000/LAB18.htm * |
| **2001-2002** | None | https://wwwn.cdc.gov/ Nchs/Nhanes/2001-2002/L40_B.htm* |
| **2003-2004** | None | https://wwwn.cdc.gov/ Nchs/Nhanes/2003-2004/L40_C.htm * |
| **2005-2006** | Standard creatinine =  0.978*(measured creatinine) – 0.016 | http://www.cdc.gov /nchs/nhanes/nhanes2005-2006/BIOPRO_D.htm |
| **2007-2008** | None | http://www.cdc.gov/ nchs/data/nhanes/nhanes_07_08/CRE_biopro_E_met_DXC800.pdf |
| **2009-2010** | None | http://www.cdc.gov/ NCHS/data/nhanes/nhanes_09_10/BIOPRO_F_met_creatinine.pdf |
| **2011-2012** | None | http://www.cdc.gov/ nchs/data/nhanes/nhanes_11_12/BIOPRO_G_met_creatinine.pdf |
| **2013-2014** | None | https://wwwn.cdc.gov/Nchs/Nhanes/2013-2014/BIOPRO_H.htm |
| **2015-2016** | None | https://wwwn.cdc.gov/Nchs/Nhanes/2015-2016/BIOPRO_I.htm |
| **2017-2018** | Standard creatinine =  1.051 * (measured creatinine) - 0.06945 | https://wwwn.cdc.gov/Nchs/Nhanes/2017-2018/BIOPRO_J.htm |
| NHANES, National Health and Nutritional Examination Survey | | |

| **Supplemental eTable 3. Trends in prevalence of risk-factors in US NHANES respondents with chronic kidney disease** | | | | | | | | | | | | |
| --- | --- | --- | --- | --- | --- | --- | --- | --- | --- | --- | --- | --- |
| **variables** | **Adults with chronic kidney disease in each survey, % (95% CI)** | | | | | | | | | | **P Value** | |
| **1999-2000** | **2001-2002** | **2003-2004** | **2005-2006** | **2007-2008** | **2009-2010** | **2011-2012** | **2013-2014** | **2015-2016** | **2017-2018** | **Linear trend** | **Quadratic trend** |
| Uncontrolled BP | 82.4 (77.7-87.2) | 73.0 (68.9-77.1) | 72.6 (67.3-77.9) | 75.9 (71.0-80.8) | 70.2 (66.0-74.4) | 65.0 (60.1-69.9) | 70.5 (64.8-76.2) | 63.2 (58.2-68.3) | 74.1 (66.8-81.3) | 65.9 (56.1-75.7) | **0.02** | 0.76 |
| SBP >130mmHg or DBP>80mmHg | 73.1 (68.5-77.7) | 60.8 (56.6-65.0) | 61.4 (55.4-67.4) | 58.2 (52.6-63.9) | 52.6 (47.5-57.7) | 48.5  (42.7-54.3) | 55.3 (48.9-61.7) | 45.7 (40.9-50.4) | 49.8 (41.2-58.5) | 51.7 (42.4-61.1) | **<0.01** | 0.13 |
| SBP >140mmHg or DBP >90mmHg | 52.5 (46.6-58.5) | 40.5 (36.2-44.7) | 40.0 (33.9-46.1) | 37.9 (34.4-41.4) | 32.7 (28.6-36.7) | 29.2 (24.1-34.3) | 35.5 (30.4-40.7) | 28.1 (23.0-33.3) | 34.2 (26.5-41.9) | 38.4 (30.1-46.6) | **0.01** | 0.27 |
| Uncontrolled blood glucose | 14.9 (8.8-20.9) | 13.6 (10.4-16.7) | 15.5 (12.0-19.0) | 16.2 (12.4-20.0) | 17.7 (12.8-22.6) | 22.3 (18.7-25.9) | 24.0 (17.3-30.7) | 23.0 (19.2-26.8) | 22.8 (18.1-27.5) | 21.6 (17.9-25.4) | **<0.01** | **<0.01** |
| Uncontrolled blood lipid | 23.3 (18.2-28.4) | 33.2 (27.9-38.5) | 19.9 (15.7-24.2) | 14.0 (11.4-16.6) | 35.0 (30.1-39.9) | 13.1 (9.3-17.0) | 12.3 (8.4-16.3) | 9.4  (6.7-12.2) | 13.3 (9.7-16.8) | 12.7 (8.0-17.5) | 0.09 | 0.14 |
| Excessive sodium intake | 72.2  (66.4-78.1) | 63.9  (59.0-68.7) | 69.1 (61.6-76.7) | 76.5 (69.4-83.7) | 71.2 (65.3-77.1) | 78.4 (74.9-82.0) | 79.5 (75.2-83.8) | 80.9 (75.6-86.2) | 80.0 (72.6-87.4) | 78.4 (73.9-82.9) | **0.04** | 0.28 |
| Excessive protein intake | N/A | N/A | N/A | 63.4 (60.1-66.8) | 51.5 (42.1-60.9) | 48.8 (42.8-54.8) | 50.9 (46.9-54.8) | 48.2 (43.7-52.6) | 58.4 (51.5-65.3) | 57.5 (51.1-63.9) | 0.12 | 0.62 |
| AHA primary diet score <20 | 51.5 (43.7-59.2) | 41.9 (33.9-50.0) | 39.8 (33.3-46.3) | 38.0 (30.6-45.4) | 36.4 (30.2-42.6) | 39.3 (32.4-46.2) | 31.9 (25.1-38.6) | 40.3 (34.3-46.3) | 40.9 (32.0-49.8) | 40.8 (30.9-50.7) | 0.07 | 0.23 |
| Current Smoker | 11.6  (7.4-15.8) | 8.3  (4.9-11.7) | 10.2 (6.5-13.9) | 11.2 (6.0-16.4) | 9.2  (7.5-11.0) | 9.8  (6.6-13.0) | 10.3 (5.3-15.3) | 10.9 (6.9-15.0) | 9.3  (4.7-14.0) | 12.4 (7.0-17.9) | 0.56 | 0.79 |
| Depression | N/A | N/A | N/A | 3.5  (1.7-5.4) | 4.6  (1.9-7.3) | 6.0  (3.5-8.5) | 6.5  (3.3-9.7) | 9.6  (7.4-11.7) | 7.1  (4.5-9.7) | 7.4  (4.1-10.8) | 0.06 | **<0.01** |
| Obesity | 32.5 (28.1-36.8) | 29.7 (24.7-34.7) | 29.8 (24.6-35.0) | 37.6 (32.9-42.3) | 32.9 (29.6-36.3) | 41.5 (37.7-45.3) | 39.1 (35.1-43.2) | 38.8 (33.4-44.2) | 40.5 (34.0-47.0) | 51.4 (43.2-59.5) | **<0.01** | 0.22 |
| Physical inactivity | N/A | N/A | N/A | N/A | 59.6 (53.1-66.2) | 63.2 (59.9-66.5) | 58.8 (50.3-67.4) | 63.5 (60.0-67.0) | 57.7 (50.0-65.5) | 50.0 (42.5-57.1) | 0.39 | 0.50 |
| Sedentary behavior | N/A | N/A | N/A | N/A | 37.5 (33.4-41.5) | 35.8 (30.5-41.1) | 47.2 (39.4-55.0) | 61.9 (53.3-70.5) | 46.8 (40.4-53.3) | 42.8 (36.8-48.8) | 0.28 | 0.71 |

Abbreviation: AHA, American Heart Association; BP, blood pressure; CI, confidence interval; DBP, diastolic blood pressure; NHANES, National Health and Nutritional Examination Survey; SBP, systolic blood pressure; US, United States of America.

Significant differences are shown in bold.

| **Supplemental eTable 4. Trends in the prevalence of** **risk-factors among US NHANES respondents with resolved chronic kidney disease** | | | | | | | | | | | | |
| --- | --- | --- | --- | --- | --- | --- | --- | --- | --- | --- | --- | --- |
|  | **Reespondents with resolved CKD, % (95% CI)** | | | | | | | | | | **P Value** | |
| **1999-2000** | **2001-2002** | **2003-2004** | **2005-2006** | **2007-2008** | **2009-2010** | **2011-2012** | **2013-2014** | **2015-2016** | **2017-2018** | **Linear Trend** | **Quadratic Trend** |
| n | 734 | 845 | 860 | 776 | 1011 | 932 | 850 | 935 | 878 | 932 | - | - |
| Uncontrolled blood pressure | 73.84 (70.06-77.62) | 69.64 (66.15-73.12) | 69.34 (65.27-73.42) | 69.48 (65.05-73.90) | 68.63 (65.38-71.87) | 64.66 (60.27-69.05) | 70.05 (65.26-74.84) | 63.76 (59.47-68.04) | 71.22 (66.14-76.31) | 66.92 (61.74-72.10) | 0.08 | 0.54 |
| SBP >130mmHg or DBP>80mmHg | 63.93 (59.72-68.13) | 59.69 (57.15-62.22) | 55.81 (51.09-60.53) | 55.00 (50.92-59.08) | 52.70 (48.65-56.75) | 48.81 (43.24-54.38) | 55.39 (52.18-58.59) | 47.55 (43.48-51.62) | 53.88 (48.76-59.01) | 53.69 (48.64-58.73) | **<0.01** | 0.24 |
| SBP >140mmHg or DBP >90mmHg | 44.44 (38.79-50.09) | 39.19 (36.57-41.81) | 36.96 (32.04-41.89) | 34.83 (31.26-38.39) | 33.65 (30.49-36.80) | 29.96 (26.15-33.77) | 32.77 (30.45-35.10) | 28.42 (24.18-32.66) | 34.68 (29.58-39.77) | 38.09 (33.57-42.61) | 0.06 | 0.73 |
| Uncontrolled blood glucose | 15.88 (12.10-19.66) | 18.91 (14.73-23.09) | 19.22 (14.63-23.82) | 17.94 (15.39-20.48) | 21.59 (16.06-27.12) | 23.06 (19.64-26.48) | 23.45 (19.29-27.62) | 22.47 (19.34-25.61) | 23.24 (18.66-27.81) | 28.14 (25.30-30.99) | **<0.01** | **<0.01** |
| Uncontrolled blood lipid | 19.65 (15.98-23.32) | 31.28 (28.14-34.42) | 21.82 (17.67-25.98) | 15.12 (12.88-17.36) | 32.52 (28.13-36.91) | 14.60 (12.18-17.01) | 12.53 (9.89-15.16) | 11.4 0(8.89-13.91) | 14.06 (10.15-17.97) | 15.79 (12.26-19.33) | 0.06 | 0.72 |
| Excessive sodium intake | 72.81 (68.05-77.57) | 68.43 (64.29-72.57) | 77.05 (72.46-81.64) | 77.47 (72.90-82.03) | 74.85 (71.88-77.82) | 81.96 (79.04-84.89) | 81.14 (78.13-84.16) | 81.95 (77.74-86.17) | 82.28 (76.53-88.03) | 80.81 (78.17-83.44) | **0.01** | 0.13 |
| Excessive protein intake | N/A | N/A | 58.00 (51.50-64.49) | 54.94 (49.82-60.05) | 52.45 (46.46-58.45) | 55.23 (51.96-58.51) | 52.95 (48.67-57.23) | 56.84 (54.28-59.40) | 56.27 (50.36-62.18) | 53.75 (48.15-59.35) | 0.87 | 0.93 |
| AHA primary diet score <20 | 53.72 (45.40-62.04) | 47.27 (42.41-52.14) | 47.07 (40.69-53.45) | 40.29 (34.16-46.42) | 45.39 (39.46-51.33) | 41.24 (36.32-46.16) | 35.10 (29.85-40.35) | 44.31 (39.67-48.95) | 45.67 (40.41-50.94) | 43.26 (36.01-50.51) | 0.18 | 0.65 |
| Current Smoker | 20.67 (16.22-25.12) | 18.60 (16.00-21.21) | 20.53 (17.28-23.78) | 17.98 (15.26-20.71) | 18.37 (15.97-20.77) | 15.39 (12.70-18.07) | 18.37 (13.20-23.53) | 18.39 (14.50-22.28) | 16.04 (12.23-19.84) | 16.34 (12.54-20.13) | **0.03** | 0.23 |
| Depression | N/A | N/A | N/A | 5.22 (3.57-6.87) | 6.68 (5.01-8.35) | 8.37 (7.12-9.61) | 7.52 (5.66-9.38) | 9.71 (8.03-11.38) | 9.91 (7.67-12.15) | 8.54 (5.79-11.30) | **0.03** | 0.27 |
| Obesity | 36.62 (30.82-42.42) | 34.42 (29.22-39.61) | 34.69 (29.57-39.82) | 40.10 (37.23-42.97) | 38.70 (34.43-42.97) | 42.85 (38.83-46.87) | 41.69 (36.42-46.96) | 42.35 (38.56-46.14) | 43.19 (38.78-47.60) | 52.49 (47.26-57.72) | **<0.01** | **0.02** |
| Physical inactivity | N/A | N/A | N/A | N/A | 54.28 (50.18-58.39) | 59.46 (56.63-62.30) | 52.52 (46.59-58.45) | 56.06 (52.75-59.38) | 50.23 (43.11-57.35) | 47.45 (42.36-52.54) | 0.18 | 0.71 |
| Sedentary behavior | N/A | N/A | N/A | N/A | 33.64 (29.85-37.42) | 35.21 (31.50-38.93) | 44.09 (38.30-49.88) | 57.93 (51.83-64.03) | 43.64 (38.51-48.76) | 41.30 (37.42-45.19) | 0.31 | 0.35 |

AHA, American Heart Association; BP, blood pressure; CI, confidence interval; CKD, chronic kidney disease; DBP, diastolic blood pressure; NHANES, National Health and Nutritional Examination Survey; SBP, systolic blood pressure; US, United States of America.

| **Supplemental eTable 5.** Risk factors for resolved chronic kidney disease by sociodemographic characteristics | | | | | | | | | | | |
| --- | --- | --- | --- | --- | --- | --- | --- | --- | --- | --- | --- |
| **% (95% CI)** | **Uncontrolled blood pressure** | **Uncontrolled blood glucose** | **Uncontrolled blood lipid** | **Current Smoker** | **Depression** | **Obesity** | **Physical inactivity** | **Sedentary behavior** | **Excessive protein intake** | **Excessive sodium intake** | **AHA primary diet score <20** |
| **Age** | | | | | | | | | | | |
| 20-44 | reference | reference | reference | reference | reference | reference | reference | reference | reference | reference | reference |
| 45-64 | **2.88 (2.36-3.51)** | **3.15 (2.56-3.87)** | **2.10 (1.71-2.59)** | 0.81 (0.65-1.01) | **1.33 (1.00-1.77)** | **1.28 (1.06-1.55)** | **2.23 (1.78-2.79)** | **1.33 (1.07-1.64)** | 0.93 (0.75-1.16) | 0.77 (0.57-1.03) | **0.54 (0.43-0.67)** |
| ≧65 | **5.18 (4.31-6.22)** | **2.59 (2.09-3.19)** | **2.18 (1.75-2.71)** | **0.22 (0.18-0.28)** | **0.67 (0.49-0.91)** | **0.70 (0.60-0.82)** | **3.76 (2.96-4.78)** | **1.26 (1.07-1.48)** | 0.87 (0.70-1.07) | **0.45 (0.34-0.60)** | **0.31 (0.25-0.37)** |
| **Sex** | | | | | | | | | | | |
| Female | reference | reference | reference | reference | reference | reference | reference | reference | reference | reference | reference |
| Male | 1.11 (0.97-1.27) | **1.64 (1.45-1.86)** | **1.65 (1.43-1.90)** | **1.64 (1.38-1.95)** | **0.64 (0.51-0.79)** | 1.03 (0.92-1.15) | **0.57 (0.49-0.65)** | 1.03 (0.90-1.18) | 1.04 (0.89-1.21) | **2.80 (2.40-3.26)** | **1.16 (1.04-1.31)** |
| **Race/ethnicity** | | | | | | | | | | | |
| Non-Hispanic White | reference | reference | reference | reference | reference | reference | reference | reference | reference | reference | reference |
| Non-Hispanic Black | **1.91 (1.63-2.25)** | **2.05 (1.77-2.39)** | **1.53 (1.27-1.85)** | **1.36 (1.15-1.61)** | **1.30 (1.00-1.69)** | **1.48 (1.30-1.68)** | **1.37 (1.15-1.62)** | **0.80 (0.67-0.95)** | **0.61 (0.51-0.72)** | **0.62 (0.52-0.74)** | **1.50 (1.27-1.77)** |
| Hispanic | **1.44**  **(1.23-1.69)** | **2.45**  **(2.01-2.97)** | **1.60**  **(1.34-1.91)** | **0.65**  **(0.52-0.81)** | **1.48**  **(1.12-1.97)** | **1.24**  **(1.07-1.44)** | **1.45**  **(1.18-1.77)** | **0.48**  **(0.40-0.57)** | 1.18  (0.98-1.41) | **0.62**  **(0.49-0.78)** | **1.55**  **(1.33-1.80)** |
| Other* | **1.34 (1.01-1.79)** | **2.50 (2.01-3.12)** | 1.20 (0.90-1.59) | 0.86 (0.65-1.14) | 1.50 (0.93-2.39) | **0.62 (0.48-0.81)** | 1.04 (0.81-1.33) | **0.65 (0.48-0.86)** | 1.17 (0.89-1.55) | 1.11 (0.81-1.53) | 0.87 (0.67-1.13) |
| **PIR** | | | | | | | | | | | |
| ＜1.30 | reference | reference | reference | reference | reference | reference | reference | reference | reference | reference | reference |
| 1.30-3.49 | 1.03 (0.89-1.20) | 0.97 (0.82-1.14) | 0.87 (0.75-1.02) | **0.54 (0.46-0.64)** | **0.47 (0.38-0.57)** | 1.04 (0.92-1.17) | **0.59 (0.48-0.71)** | 0.94 (0.77-1.15) | **1.25 (1.07-1.46)** | **1.44 (1.19-1.74)** | **0.78 (0.66-0.92)** |
| ≥3.50 | 0.88 (0.73-1.04) | **0.77 (0.63-0.94)** | **0.65 (0.53-0.80)** | **0.33 (0.27-0.42)** | **0.23 (0.16-0.35)** | 0.94 (0.80-1.10) | **0.51 (0.42-0.61)** | **1.31 (1.04-1.65)** | **1.56 (1.29-1.89)** | **1.81 (1.49-2.21)** | **0.48 (0.40-0.59)** |
| **Education level** | | | | | | | | | | | |
| Below High School | reference | reference | reference | reference | reference | reference | reference | reference | reference | reference | reference |
| High school graduate or GED | 1.00 (0.82-1.20) | **0.81 (0.68-0.96)** | **0.68 (0.57-0.81)** | **0.72 (0.60-0.86)** | **0.59 (0.41-0.83)** | 1.10 (0.95-1.28) | **0.59 (0.48-0.71)** | 0.89 (0.77-1.03) | **1.24 (1.00-1.53)** | **1.51 (1.28-1.77)** | 0.87 (0.75-1.01) |
| Some college or above | **0.79 (0.67-0.94)** | **0.68 (0.58-0.79)** | **0.64 (0.55-0.76)** | **0.42 (0.35-0.51)** | **0.47 (0.35-0.64)** | 0.99 (0.86-1.15) | **0.51 (0.42-0.61)** | **1.33 (1.15-1.55)** | **1.38 (1.14-1.67)** | **1.77 (1.51-2.07)** | **0.54 (0.47-0.62)** |
| **Marital status** | | | | | | | | | | | |
| Married or living with partner | reference | reference | reference | reference | reference | reference | reference | reference | reference | reference | reference |
| Never married | 1.04 (0.84-1.30) | 0.82 (0.64-1.05) | 1.04 (0.81-1.34) | 1.20 (0.93-1.55) | 1.14 (0.83-1.57) | 0.95 (0.77-1.18) | 1.10 (0.87-1.40) | 1.17 (0.89-1.54) | 1.18 (0.95-1.48) | **0.71 (0.53-0.95)** | 1.12 (0.88-1.42) |
| Widowed, divorced or separated | 1.08 (0.90-1.29) | 0.96 (0.82-1.12) | 1.06 (0.91-1.24) | **1.70 (1.44-2.01)** | **1.64 (1.24-2.16)** | 1.03 (0.88-1.19) | **1.23 (1.03-1.46)** | **1.23 (1.02-1.49)** | 1.00 (0.85-1.17) | **0.77 (0.66-0.91)** | **1.18 (1.01-1.38)** |
| **Employment status** | | | | | | | | | | | |
| Unemployed | reference | reference | reference | reference | reference | reference | reference | reference | reference | reference | reference |
| Employed | 1.05 (0.89-1.24) | **1.18 (1.01-1.37)** | **1.28 (1.08-1.52)** | **1.72 (1.44-2.06)** | **4.05 (2.83-5.79)** | 0.95 (0.81-1.11) | **1.89 (1.58-2.26)** | 0.95 (0.80-1.13) | **0.80 (0.68-0.95)** | **0.65 (0.54-0.78)** | 1.05 (0.90-1.24) |

Abbreviation: AHA, American Heart Association; CI, confidence interval; CKD, chronic kidney disease; GED, general educational development test; PIR, ratio of family income to poverty level.

* Includes non-Hispanic Asian, multi-racial, and other.

Logistic regression adjusted for age, sex, and race. Significant differences vs reference (P<0.05) are shown in bold

Abbreviation: AHA, American Heart Association; NHANES, National Health and Nutritional Examination Survey.

**eFigure 1.** Mean depression score, AHA primary diet score, body mass index, physical activity levels, sitting times, HbA1c, systolic blood pressure, and protein and sodium intake in NHANES respondents with chronic kidney disease, 1999--2018.

| **Supplemental eTable 6**. Prevalence of risk factors in NHANES respondents with chronic kidney disease, 1999-2018 (4-year cycles) | | | | | |
| --- | --- | --- | --- | --- | --- |
|  | % Respondents (95% CI) | | | | |
| 1999-2002 | 2003-2006 | 2007-2010 | 2011-2014 | 2015-2018 |
| Uncontrolled blood pressure* | 77.22  (74.08-80.35) | 74.24  (70.61-77.86) | 67.59  (64.35-70.83) | 66.61  (62.95-70.26) | 69.93  (63.66-76.20) |
| Uncontrolled blood glucose | 14.13  (10.92-17.35) | 15.83  (13.23-18.43) | 20.02  (16.98-23.06) | 23.48  (19.79-27.17) | 22.23  (19.21-25.25) |
| Uncontrolled blood lipid | 28.76  (25.06-32.46) | 17.00 (14.50-19.51) | 23.96 (20.74-27.18) | 10.78 (8.35-13.20) | 13.00 (10.00-15.99) |
| Excessive sodium intake | 67.49  (63.85-71.14) | 72.80  (67.43-78.16) | 74.84  (71.47-78.21) | 80.22  (76.80-83.64) | 79.20  (74.85-83.55) |
| Excessive protein intake | N/A | 57.49  (52.58-62.40) | 49.85  (46.27-53.44) | 53.54  (49.26-57.82) | 53.62  (48.21-59.03) |
| AHA primary diet score<20 | 46.05  (40.42-51.68) | 38.91  (33.92-43.90) | 37.87  (33.17-42.57) | 36.27  (31.68-40.87) | 40.86  (34.22-47.50) |
| Current Smoker | 9.77  (7.06-12.49) | 10.69  (7.53-13.85) | 9.53  (7.69-11.38) | 10.63  (7.50-13.77) | 10.91  (7.32-14.50) |
| Depression | N/A | 1.75  (0.71-2.78) | 5.30  (3.46-7.15) | 8.13  (6.16-10.11) | 7.27  (5.13-9.41) |
| Obesity | 30.92  (27.49-34.36) | 33.64  (30.00-37.28) | 37.26  (34.56-39.96) | 38.95  (35.48-42.42) | 46.00  (40.55-51.44) |
| Physical inactivity | N/A | N/A | 61.44  (57.72-65.15) | 61.33  (56.90-65.76) | 53.68  (48.16-59.21) |
| Sedentary behavior | N/A | N/A | 36.64  (33.31-39.97) | 55.07  (48.89-61.24) | 44.75  (40.28-49.23) |

Abbreviation: AHA, American Heart Association; CI, confidence interval; NHANES, National Health and Nutritional Examination Survey.

*we defined uncontrolled blood pressure as mean systolic blood pressure (SBP) ≥120mmHg.
